# Supplementary material for: Co-Pyrolysis of Fenton Sludge and Pomelo Peel for Heavy Metal Stabilization: Speciation Mechanism and Risk Evaluation
Source: MDPI journal article supplement (doi:10.3390/w15213733), 2023-10-26
Supplement: s1 [file s1]

---

*Supplementary Materials*

*for*

**Co-Pyrolysis of Fenton Sludge and Pomelo Peel for Heavy  
Metal Stabilization: Speciation Mechanism and Risk  
Evaluation**

Cheng Huang<sup>1,2,3</sup>, Lixian Wang<sup>1</sup>, Lingyi Fan<sup>3</sup>, Yong Chen<sup>1,\*</sup>

<sup>1</sup> School of Environmental and Engineering, Huazhong University of Science and  
Technology, Wuhan 430074, China

<sup>2</sup> Jiangxi Jindalai Environmental Protection Co., Ltd, Nanchang 330100, China

<sup>3</sup> School of Environmental and Chemical Engineering, Jiangsu University of Science  
and Technology, Zhenjiang, 212003, China

\*Corresponding author: E-mail address: [yichen@mail.hust.edu.cn](mailto:yichen@mail.hust.edu.cn); Tel./Fax: +86-511-  
84400076

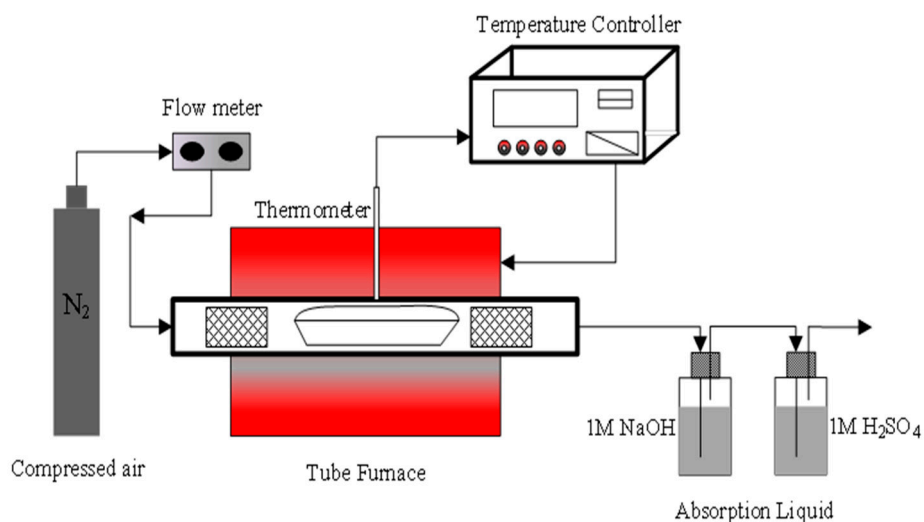

**Figure S1.** Fixed bed reactor system for co-pyrolysis.

**Table S1.** Details of BCR extraction procedure and extraction fluids

| Fraction          | Extraction reagents                                             | Conditions                      |
|-------------------|-----------------------------------------------------------------|---------------------------------|
| Exchangeable (F1) | 20 mL, 0.1M acetic acid                                         | Shaking, 16 h at 25 °C          |
| Reducible (F2)    | 20 mL, 0.1 M hydroxyl ammonium chloride (pH 2)                  | Shaking, 16 h at 25 °C          |
| Oxidizable (F3)   | Firstly, 5 mL, $H_2O_2$ (30%, v/v)                              | Firstly, shaking, 1 h at 25 °C  |
|                   | Next, 5 mL, $H_2O_2$ (30%, v/v)                                 | Next, shaking, 7 h at 80 °C     |
|                   | Finally 20 mL, 1 M ammonium acetate                             | Finally, shaking, 16 h at 25 °C |
| Residual (F4)     | Concentrated acid mixture<br>( $HNO_3:HClO_4:HF = 5:5:2$ , v/v) | Microwave digestion             |

---

**Table S2.** Microwave digestion procedure used in this study

---

| Step | Heating-up time (min) | Temperature (°C) | Retention time (min) |
|------|-----------------------|------------------|----------------------|
| 1    | 10                    | 120              | 5                    |
| 2    | 3                     | 160              | 5                    |
| 3    | 10                    | 180              | 20                   |

---
