# Supplementary material for: Co-Pyrolysis of Fenton Sludge and Pomelo Peel for Heavy Metal Stabilization: Speciation Mechanism and Risk Evaluation
Source: MDPI journal article supplement (doi:10.3390/w15213733), 2023-10-26
Supplement: s1 [file s1]

Archive with 1 entries (1 files):
- water-2646261-supplementary.pdf
